# Supplementary material
Source: publisher figshare collection journal article supplement (https://acs.figshare.com/ndownloader/files/4622956)

**Supplementary Figure 1.** Expression of hERG in *E. coli* and rabbit reticulocyte cell free protein expression systems. The human potassium voltage-gated channel ERG protein (Acc # Q12809) was expressed from the plasmid pEXP4-DEST in *E. coli* and rabbit reticulocyte cell-free protein expression systems in the presence of histidine-tagged NLPs. In the latter case, complexes were purified by nickel-immobilized affinity chromatography. Proteins were separated by SDS PAGE and exposed to a film. C, crude extract; F, flow through; W, wash fractions; E, imidazole eluted fractions.

**Supplementary Figure 2.** Effect of NLPs on protein product yield and solubility. bR was expressed from plasmid pIVEX2.4b of NLPs. NLPs were composed of his-apoA1 as a scaffold and DMPC. Increasing amounts of NLPs were added to the reaction (see X axis). Reactions were trace-labeled with [<sup>35</sup>S]Met and the yield was calculated by the TCA precipitation method. Total (empty bars) and soluble (filled bars) product yields are shown.

Supplementary Figure 1

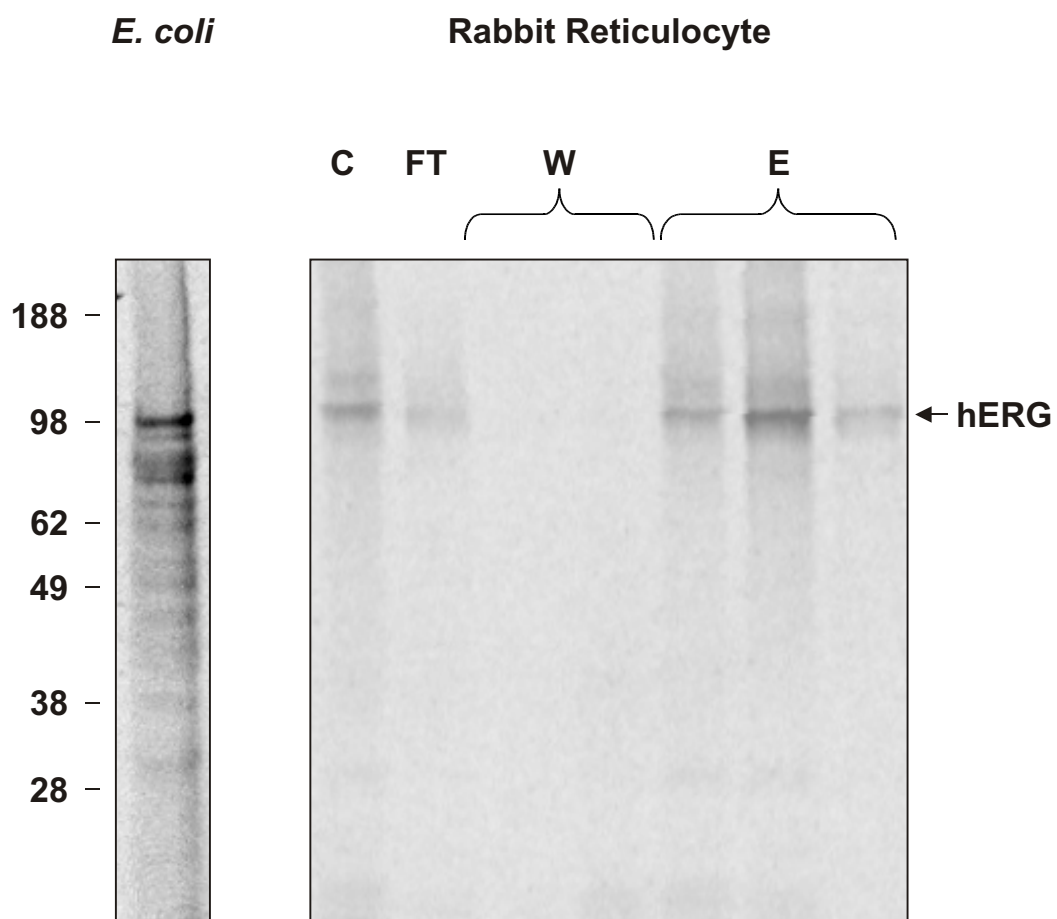

Supplementary Figure 2

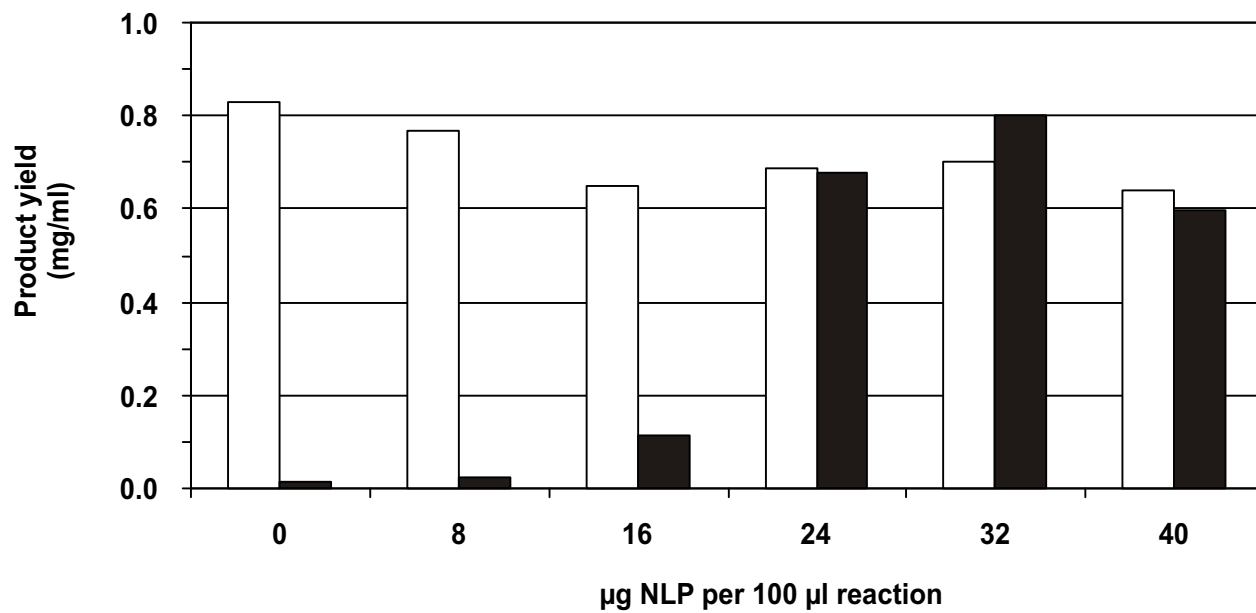

Supplement: Supplementary file 1 [file 4622956]
